# Supplementary material
Source: MDPI journal article supplement (https://www.mdpi.com/2073-8994/15/7/1399)
Supplement: s1 [file s1]

Table S1. Atomic coordinates, equivalent isotropic displacement parameters ( $\text{\AA}^2$ ) and structural occupation factor for  $x = 0.03$ .

| Site        | Wyckoff | $x$         | $y$          | $z$         | $U_{\text{iso}}^*/U_{\text{eq}}$ | Occ.      |
|-------------|---------|-------------|--------------|-------------|----------------------------------|-----------|
| Ba1         | 8g      | 0.5         | 0            | 0.13355(13) | 0.0402(5)                        | 1         |
| M1(Sr1/Eu1) | 8h      | 0.32846(16) | 0.17154(16)  | 0           | 0.0341(8)                        | 0.97/0.03 |
| M2(Ba2/Sr2) | 32m     | 0.20029(9)  | -0.07166(10) | 0.13446(8)  | 0.0361(4)                        | 0.5/0.5   |
| O1          | 16k     | 0.3504(10)  | -0.0244(11)  | 0           | 0.030(5)                         | 1         |
| O2          | 26l     | 0.3724(8)   | -0.1278(8)   | 0.2125(11)  | 0.040(4)                         | 1         |
| O3          | 32m     | 0.3840(10)  | -0.2435(12)  | 0.3354(9)   | 0.065 (5)                        | 1         |
| O4          | 8h      | 0.1977(10)  | 0.3023(10)   | 0           | 0.032(6)                         | 1         |
| O5          | 32m     | -0.041(3)   | -0.0944(19)  | 0.267(4)    | 0.112(18)*                       | 0.375     |
| O6          | 16k     | 0.044(3)    | -0.0964(18)  | 0           | 0.13(2)                          | 0.75      |
| B1          | 16l     | 0.3406(13)  | -0.1594(13)  | 0.2963(15)  | 0.039(8)                         | 1         |
| B2          | 8h      | 0.372(2)    | -0.128(2)    | 0           | 0.039(10)*                       | 1         |
| B3          | 4a      | 0           | 0            | 0.25        | 0.046(16)                        | 1         |
| B4          | 4c      | 0           | 0            | 0           | 0.028(11)*                       | 1         |

Table S2. Anisotropic atomic displacement parameters ( $\text{\AA}^2$ ) for  $x = 0.03$ .

| Site        | $U^{11}$   | $U^{22}$   | $U^{33}$   | $U^{12}$     | $U^{13}$  | $U^{23}$  |
|-------------|------------|------------|------------|--------------|-----------|-----------|
| Ba1         | 0.0446(8)  | 0.0446(8)  | 0.0313(11) | -0.0012 (10) | 0         | 0         |
| M1(Sr1/Eu1) | 0.0414(13) | 0.0414(13) | 0.0196(15) | 0.0276(15)   | 0         | 0         |
| M2(Ba2/Sr2) | 0.0411(8)  | 0.0362(7)  | 0.0310(7)  | -0.0053(5)   | 0.0013(5) | 0.0005(5) |
| O1          | 0.022 (8)  | 0.041 (9)  | 0.027 (8)  | -0.003 (7)   | 0         | 0         |
| O2          | 0.038 (6)  | 0.038 (6)  | 0.046 (10) | -0.007 (8)   | 0.011 (5) | 0.011 (5) |
| O3          | 0.043 (7)  | 0.091 (10) | 0.062 (9)  | 0.022 (8)    | 0.015 (6) | 0.048 (8) |
| O4          | 0.036 (8)  | 0.036 (8)  | 0.024 (12) | 0.024 (10)   | 0         | 0         |
| O6          | 0.17 (4)   | 0.10 (3)   | 0.10 (3)   | -0.02 (3)    | 0         | 0         |
| B1          | 0.032 (10) | 0.032 (10) | 0.053 (19) | -0.014 (13)  | 0.001 (9) | 0.001 (9) |
| B4          | 0.05 (2)   | 0.05 (2)   | 0.04 (3)   | 0            | 0         | 0         |

Table S3. Atomic coordinates, equivalent isotropic displacement parameters ( $\text{\AA}^2$ ) and structural occupation factor for  $x = 0.06$ .

| Site        | Wyckoff | $x$         | $y$          | $z$         | $U_{\text{iso}}^*/U_{\text{eq}}$ | Occ.      |
|-------------|---------|-------------|--------------|-------------|----------------------------------|-----------|
| Ba1         | 8g      | 0.5         | 0            | 0.13349 (9) | 0.0430 (4)                       | 1         |
| M1(Sr1/Eu1) | 8h      | 0.3283 (1)  | 0.17167 (12) | 0           | 0.0389 (6)                       | 0.94/0.06 |
| M2(Ba2/Sr2) | 32m     | 0.20046 (7) | -0.07172 (7) | 0.13426 (6) | 0.0371 (3)                       | 0.5/0.5   |
| O1          | 16k     | 0.3477 (7)  | -0.0240 (7)  | 0           | 0.033 (4)                        | 1         |
| O2          | 26l     | 0.3735 (7)  | -0.1265 (7)  | 0.2115 (8)  | 0.048 (3)                        | 1         |
| O3          | 32m     | 0.3853 (7)  | -0.2411 (9)  | 0.3373 (7)  | 0.066 (4)                        | 1         |
| O4          | 8h      | 0.1978 (8)  | 0.3022 (8)   | 0           | 0.037 (4)                        | 1         |
| O5          | 32m     | -0.045 (2)  | -0.0966 (16) | 0.261 (3)   | 0.111 (12)*                      | 0.375     |
| O6          | 16k     | 0.0536 (19) | -0.0960 (15) | 0           | 0.098 (11)                       | 0.75      |
| B1          | 16l     | 0.3398 (11) | -0.1602 (11) | 0.2945 (16) | 0.046 (6)                        | 1         |
| B2          | 8h      | 0.3765 (15) | -0.1235 (15) | 0           | 0.031 (6)*                       | 1         |

|    |    |   |   |      |          |   |
|----|----|---|---|------|----------|---|
| B3 | 4a | 0 | 0 | 0.25 | 0.12 (6) | 1 |
| B4 | 4c | 0 | 0 | 0    | 0.10 (2) | 1 |

Table S4. Anisotropic atomic displacement parameters ( $\text{\AA}^2$ ) for  $x = 0.06$ .

| Site                | $U^{11}$   | $U^{22}$   | $U^{33}$       | $U^{12}$    | $U^{13}$   | $U^{23}$   |
|---------------------|------------|------------|----------------|-------------|------------|------------|
| Ba1                 | 0.0445 (6) | 0.0445 (6) | 0.0400 (8)     | −0.0040 (7) | 0          | 0          |
| <i>M1</i> (Sr1/Eu1) | 0.0448 (9) | 0.0448 (9) | 0.0271<br>(11) | 0.0249 (11) | 0          | 0          |
| <i>M2</i> (Ba2/Sr2) | 0.0392 (6) | 0.0358 (5) | 0.0363 (5)     | −0.0044 (4) | 0.0015 (4) | 0.0004 (4) |
| O1                  | 0.028 (6)  | 0.026 (6)  | 0.045 (6)      | 0.001 (5)   | 0          | 0          |
| O2                  | 0.060 (5)  | 0.060 (5)  | 0.026 (6)      | 0.003 (7)   | 0.007 (4)  | 0.007 (4)  |
| O3                  | 0.051 (6)  | 0.083 (7)  | 0.064 (6)      | 0.014 (5)   | −0.004 (5) | 0.023 (6)  |
| O4                  | 0.038 (6)  | 0.038 (6)  | 0.036 (9)      | 0.010 (7)   | 0          | 0          |
| O6                  | 0.11 (2)   | 0.10 (2)   | 0.078 (15)     | 0.016 (15)  | 0          | 0          |
| B1                  | 0.040 (7)  | 0.040 (7)  | 0.059 (14)     | −0.005(10)  | −0.015(8)  | −0.015(8)  |
| B3                  | 0.010 (16) | 0.010 (16) | 0.18 (17)      | 0           | 0          | 0          |
| B4                  | 0.10 (3)   | 0.10 (3)   | 0.09 (5)       | 0           | 0          | 0          |

Table S5. Atomic coordinates, equivalent isotropic displacement parameters ( $\text{\AA}^2$ ) and structural occupation factor for  $x = 0.15$ .

| Site                | Wyckoff | $x$          | $y$          | $z$         | $U_{\text{iso}}^*/U_{\text{eq}}$ | Occ.      |
|---------------------|---------|--------------|--------------|-------------|----------------------------------|-----------|
| Ba1                 | 8g      | 0.5          | 0            | 0.13351 (9) | 0.0411 (4)                       | 1         |
| <i>M1</i> (Sr1/Eu1) | 8h      | 0.32919 (11) | 0.1708 (1)   | 0           | 0.0335 (5)                       | 0.85/0.15 |
| <i>M2</i> (Ba2/Sr2) | 32m     | 0.20070 (7)  | −0.07170 (7) | 0.13414 (5) | 0.0303 (3)                       | 0.5/0.5   |
| O1                  | 16k     | 0.3482 (8)   | −0.0249 (8)  | 0           | 0.029 (3)                        | 1         |
| O2                  | 26l     | 0.3718 (7)   | −0.1282 (7)  | 0.2113 (7)  | 0.041 (3)                        | 1         |
| O3                  | 32m     | 0.3842 (8)   | −0.2430 (9)  | 0.3390 (7)  | 0.062 (4)                        | 1         |
| O4                  | 8h      | 0.1971 (8)   | 0.3029 (8)   | 0           | 0.032 (4)                        | 1         |
| O5                  | 32m     | −0.095 (2)   | −0.042 (3)   | 0.226 (3)   | 0.124 (15)*                      | 0.375     |
| O6                  | 16k     | 0.050 (2)    | −0.0960 (17) | 0           | 0.120 (14)                       | 0.75      |
| B1                  | 16l     | 0.3404 (9)   | −0.1596 (9)  | 0.2955 (10) | 0.026 (4)                        | 1         |
| B2                  | 8h      | 0.3752 (14)  | −0.1248 (14) | 0           | 0.024 (5)*                       | 1         |
| B3                  | 4a      | 0            | 0            | 0.25        | 0.064 (14)*                      | 1         |
| B4                  | 4c      | 0            | 0            | 0           | 0.11 (3)                         | 1         |

Table S6. Anisotropic atomic displacement parameters ( $\text{\AA}^2$ ) for  $x = 0.15$ .

| Site                | $U^{11}$   | $U^{22}$   | $U^{33}$   | $U^{12}$    | $U^{13}$   | $U^{23}$    |
|---------------------|------------|------------|------------|-------------|------------|-------------|
| Ba1                 | 0.0431 (6) | 0.0431 (6) | 0.0371 (8) | −0.0027 (7) | 0          | 0           |
| <i>M1</i> (Sr1/Eu1) | 0.0415 (9) | 0.0415 (9) | 0.0175 (9) | 0.0218 (11) | 0          | 0           |
| <i>M2</i> (Ba2/Sr2) | 0.0357 (6) | 0.0298 (6) | 0.0253 (5) | −0.0042 (4) | 0.0017 (3) | −0.0002 (3) |
| O1                  | 0.025 (6)  | 0.033 (6)  | 0.028 (5)  | −0.005 (5)  | 0          | 0           |
| O2                  | 0.050 (5)  | 0.050 (5)  | 0.023 (5)  | −0.001 (6)  | 0.014 (4)  | 0.014 (4)   |
| O3                  | 0.046 (6)  | 0.083 (8)  | 0.057 (6)  | 0.007 (6)   | −0.001 (5) | 0.016 (6)   |

|    |           |           |           |            |            |            |
|----|-----------|-----------|-----------|------------|------------|------------|
| O4 | 0.030 (6) | 0.030 (6) | 0.038 (9) | 0.003 (7)  | 0          | 0          |
| O6 | 0.11 (2)  | 0.08 (2)  | 0.17 (3)  | 0.021 (18) | 0          | 0          |
| B1 | 0.031 (6) | 0.031 (6) | 0.018 (7) | −0.006 (8) | −0.008 (5) | −0.008 (5) |
| B4 | 0.09 (4)  | 0.09 (4)  | 0.17 (8)  | 0          | 0          | 0          |

Table S7. Atomic coordinates, equivalent isotropic displacement parameters ( $\text{\AA}^2$ ) and structural occupation factor for  $x = 0.20$ .

| Site        | Wyckoff | $x$          | $y$          | $z$          | $U_{\text{iso}}^*/U_{\text{eq}}$ | Occ.    |
|-------------|---------|--------------|--------------|--------------|----------------------------------|---------|
| Ba1         | 8g      | 0.5          | 0            | 0.13417 (15) | 0.0597 (7)                       | 1       |
| M1(Sr1/Eu1) | 8h      | 0.32951 (16) | 0.17049 (16) | 0            | 0.0400 (8)                       | 0.8/0.2 |
| M2(Ba2/Sr2) | 32m     | 0.20116 (9)  | −0.07164 (9) | 0.13381 (7)  | 0.0362 (4)                       | 0.5/0.5 |
| O1          | 16k     | 0.3487 (11)  | −0.0252 (11) | 0            | 0.036 (5)                        | 1       |
| O2          | 26l     | 0.3710 (9)   | −0.1290 (9)  | 0.2142 (11)  | 0.052 (5)                        | 1       |
| O3          | 32m     | 0.3856 (10)  | −0.2418 (12) | 0.3378 (10)  | 0.069 (5)                        | 1       |
| O4          | 8h      | 0.1960 (12)  | 0.3040 (12)  | 0            | 0.048 (7)                        | 1       |
| O5          | 32m     | −0.092 (3)   | −0.041 (4)   | 0.221 (4)    | 0.15 (3)*                        | 0.375   |
| O6          | 16k     | 0.048 (3)    | −0.095 (2)   | 0            | 0.15 (2)                         | 0.75    |
| B1          | 16l     | 0.3407 (15)  | −0.1593 (15) | 0.2937 (19)  | 0.043 (7)                        | 1       |
| B2          | 8h      | 0.3784 (19)  | −0.1216 (19) | 0            | 0.027 (7)*                       | 1       |
| B3          | 4a      | 0            | 0            | 0.25         | 0.059(17)*                       | 1       |
| B4          | 4c      | 0            | 0            | 0            | 0.047(17)                        | 1       |

Table S8. Anisotropic atomic displacement parameters ( $\text{\AA}^2$ ) for  $x = 0.20$ .

| Site        | $U^{11}$    | $U^{22}$    | $U^{33}$    | $U^{12}$     | $U^{13}$   | $U^{23}$    |
|-------------|-------------|-------------|-------------|--------------|------------|-------------|
| Ba1         | 0.0526 (10) | 0.0526 (10) | 0.0738 (15) | −0.0039 (12) | 0          | 0           |
| M1(Sr1/Eu1) | 0.0453 (13) | 0.0453 (13) | 0.0292 (14) | 0.0214 (16)  | 0          | 0           |
| M2(Ba2/Sr2) | 0.0400 (8)  | 0.0327 (7)  | 0.0358 (7)  | −0.0053 (5)  | 0.0026 (5) | −0.0004 (5) |
| O1          | 0.028 (9)   | 0.039 (9)   | 0.041 (8)   | −0.004 (7)   | 0          | 0           |
| O2          | 0.054 (7)   | 0.054 (7)   | 0.047 (10)  | −0.003 (9)   | 0.017 (6)  | 0.017 (6)   |
| O3          | 0.047 (8)   | 0.077 (10)  | 0.083 (9)   | 0.026 (8)    | 0.004 (7)  | 0.036 (8)   |
| O4          | 0.049 (10)  | 0.049 (10)  | 0.047 (14)  | 0.015 (12)   | 0          | 0           |
| O6          | 0.11 (4)    | 0.13 (4)    | 0.22 (4)    | 0.01 (3)     | 0          | 0           |
| B1          | 0.044 (11)  | 0.044 (11)  | 0.040 (16)  | −0.012 (15)  | −0.018 (9) | −0.018 (9)  |
| B4          | 0.023 (19)  | 0.023 (19)  | 0.09 (4)    | 0            | 0          | 0           |

Table S9. Atomic coordinates, equivalent isotropic displacement parameters ( $\text{\AA}^2$ ) and structural occupation factor for  $x = 0.25$ .

| Site        | Wyckoff | $x$        | $y$        | $z$        | $U_{\text{iso}}^*/U_{\text{eq}}$ | Occ.      |
|-------------|---------|------------|------------|------------|----------------------------------|-----------|
| Ba1         | 8g      | 0.5        | 0          | 0.1341 (2) | 0.0630 (10)                      | 1         |
| M1(Sr1/Eu1) | 8h      | 0.3305 (2) | 0.1695 (2) | 0          | 0.0442 (11)                      | 0.75/0.25 |

|                             |            |              |               |              |             |                   |
|-----------------------------|------------|--------------|---------------|--------------|-------------|-------------------|
| <i>M2</i> (Ba2/Sr2/<br>Eu2) | <i>32m</i> | 0.20055 (13) | −0.07142 (13) | 0.13402 (11) | 0.0431 (6)  | 0.5/0.48/<br>0.02 |
| O1                          | <i>16k</i> | 0.3473 (16)  | −0.0233 (12)  | 0            | 0.043 (6)   | 1                 |
| O2                          | <i>26l</i> | 0.3708 (10)  | −0.1292 (10)  | 0.2134 (14)  | 0.043 (6)   | 1                 |
| O3                          | <i>32m</i> | 0.3820 (12)  | −0.2440 (12)  | 0.3367 (11)  | 0.055 (6)   | 1                 |
| O4                          | <i>8h</i>  | 0.3047 (14)  | −0.1953 (14)  | 0            | 0.049 (9)   | 1                 |
| O5                          | <i>19j</i> | −0.1068 (15) | 0.00 (2)      | 0.25 (10)    | 0.20 (9)*   | 0.75              |
| O6                          | <i>16k</i> | 0.027 (6)    | −0.112 (3)    | 0            | 0.17 (3)    | 0.75              |
| B1                          | <i>16l</i> | 0.335 (2)    | −0.165 (2)    | 0.295 (2)    | 0.070 (13)* | 1                 |
| B2                          | <i>8h</i>  | 0.3780 (14)  | −0.1220 (14)  | 0            | 0.009 (7)*  | 1                 |
| B3                          | <i>4a</i>  | 0            | 0             | 0.25         | 0.045 (1)   | 1                 |
| B4                          | <i>4c</i>  | 0            | 0             | 0            | 0.07 (3)*   | 1                 |

Table S10. Anisotropic atomic displacement parameters ( $\text{\AA}^2$ ) for  $x = 0.25$ .

| Site                        | $U^{11}$    | $U^{22}$    | $U^{33}$   | $U^{12}$    | $U^{13}$   | $U^{23}$    |
|-----------------------------|-------------|-------------|------------|-------------|------------|-------------|
| Ba1                         | 0.0551 (13) | 0.0551 (13) | 0.079 (2)  | −0.0024(16) | 0          | 0           |
| <i>M1</i> (Sr1/Eu1)         | 0.0500 (18) | 0.0500 (18) | 0.033 (2)  | 0.020 (2)   | 0          | 0           |
| <i>M2</i> (Ba2/Sr2/<br>Eu2) | 0.0467 (12) | 0.0395 (11) | 0.0430 (9) | −0.0074 (8) | 0.0040 (8) | −0.0021 (8) |
| O1                          | 0.058 (12)  | 0.022 (9)   | 0.050 (9)  | −0.015 (8)  | 0          | 0           |
| O2                          | 0.058 (12)  | 0.022 (9)   | 0.050 (9)  | −0.015 (8)  | 0          | 0           |
| O3                          | 0.055 (11)  | 0.037 (9)   | 0.072 (12) | 0.030 (8)   | −0.029 (8) | 0.007 (8)   |
| O4                          | 0.071 (14)  | 0.071 (14)  | 0.006 (13) | 0.003 (18)  | 0          | 0           |
| O6                          | 0.28 (7)    | 0.03 (3)    | 0.19(5)    | 0.02 (3)    | 0          | 0           |
| B3                          | 0.0240 (5)  | 0.0240 (5)  | 0.086 (3)  | 0           | 0          | 0           |

Table S11. Refined number of electrons per site and assignment for cation sites in the structure of  $\text{Ba}_3(\text{Sr}_{3-1.5x}\text{Eu}_x)\text{B}_4\text{O}_{12}$  phosphors.

| Site<br>(new) | SC | SOF   | SSF <sub>exp</sub> [ $e^-$ ] | Assigned occupancy                     | SSF <sub>calc</sub> [ $e^-$ ] |
|---------------|----|-------|------------------------------|----------------------------------------|-------------------------------|
| $x = 0.03$    |    |       |                              |                                        |                               |
| Ba1           | Sr | 1.43  | 54.27                        | Ba <sub>1.00</sub>                     | 56                            |
| Sr1           | Sr | 1.017 | 38.65                        | Sr <sub>0.945</sub> Eu <sub>0.03</sub> | 38.18                         |
| Sr/Ba1        | Sr | 1.24  | 47.12                        | Sr <sub>0.50</sub> Ba <sub>0.50</sub>  | 47.00                         |
| $x = 0.06$    |    |       |                              |                                        |                               |
| Ba1           |    | 1.42  | 54.05                        | Ba <sub>1.00</sub>                     | 56                            |
| Sr1           |    | 1.03  | 39.09                        | Sr <sub>0.91</sub> Eu <sub>0.06</sub>  | 38.36                         |
| Sr/Ba1        |    | 1.26  | 47.82                        | Sr <sub>0.50</sub> Ba <sub>0.50</sub>  | 47.00                         |
| $x = 0.15$    |    |       |                              |                                        |                               |
| Ba1           | Sr | 1.41  | 53.64                        | Ba <sub>1.00</sub>                     | 56                            |
| Sr1           | Sr | 1.06  | 40.18                        | Sr <sub>0.775</sub> Eu <sub>0.15</sub> | 38.90                         |
| Sr/Ba1        | Sr | 1.280 | 48.58                        | Sr <sub>0.50</sub> Ba <sub>0.50</sub>  | 47.00                         |
| $x = 0.20$    |    |       |                              |                                        |                               |
| Ba1           | Sr | 1.38  | 52.41                        | Ba <sub>1.00</sub>                     | 56                            |
| Sr1           | Sr | 1.09  | 41.39                        | Sr <sub>0.70</sub> Eu <sub>0.20</sub>  | 39.2                          |
| Sr/Ba1        | Sr | 1.29  | 49.12                        | Sr <sub>0.50</sub> Ba <sub>0.50</sub>  | 47.00                         |

|            |    |      |       |                                                              |        |
|------------|----|------|-------|--------------------------------------------------------------|--------|
| $x = 0.25$ |    |      |       |                                                              |        |
| Ba1        | Sr | 1.01 | 56.34 | Ba <sub>1.00</sub>                                           | 56     |
| Sr1        | Sr | 1.09 | 41.43 | Sr <sub>0.70</sub> Eu <sub>0.20</sub>                        | 39.2   |
| Sr/Ba1     | Sr | 1.30 | 49.21 | Sr <sub>0.48125</sub> Ba <sub>0.50</sub> Eu <sub>0.125</sub> | 47.075 |

---

\*SC = scattering curve used to refine site occupancy; SOF = refined site-occupation factor; SSF<sub>exp</sub> and SSF<sub>calc</sub> = experimental and calculated electrons per site
